# Supplementary material for: Role of the Environment Polarity on the Photophysical Properties of Mesogenic Hetero-Polymetallic Complexes
Source: MDPI journal article supplement (doi:10.3390/molecules29040750), 2024-02-06
Supplement: s1 [file s1]

SUPPLEMENTARY INFORMATION

for

# Role of the Environment Polarity on the Photophysical Properties of Mesogenic Hetero-Polymetallic Complexes

Adelina A. Andelescú <sup>1</sup>, Angela Candrea <sup>2,3,\*</sup>, Evelyn Popa <sup>1</sup>, Alexandru Visan <sup>1</sup>, Carmen Cretu <sup>1</sup>, Massimo La Deda <sup>2,3,\*</sup> and Elisabeta I. Szerb <sup>1,\*</sup>

<sup>1</sup> “Coriolan Drăgulescu” Institute of Chemistry, Romanian Academy, 24 Mihai Viteazu Blvd., 300223 Timisoara, Romania; aandelescú@acad-icht.tm.edu.ro (A.A.A.); pevelyn@acad-icht.tm.edu.ro (E.P.); visan.alexandru@acad-icht.tm.edu.ro (A.V.); cretucarmen@acad-icht.tm.edu.ro (C.C.)

<sup>2</sup> Department of Chemistry and Chemical Technologies, University of Calabria, 87036 Rende, Italy; angela.candrea@unical.it

<sup>3</sup> Institute of Nanotechnology (NANOTEC), National Research Council (CNR), UOS Cosenza, 87036 Rende, Italy

\* Correspondence: massimo.ladedda@unical.it (M.L.D.); eszerb@acad-icht.tm.edu.ro (E.I.S.)

|                                                                                                                                              |   |
|----------------------------------------------------------------------------------------------------------------------------------------------|---|
| <sup>1</sup> H NMR spectra of ligand <b>L1</b> and complex <b>Zn<sub>1</sub>Fe<sub>2</sub></b> in CDCl <sub>3</sub> . <b>Figure S1</b> ..... | 2 |
| <sup>1</sup> H NMR spectra of ligand <b>L2</b> and complex <b>Zn<sub>2</sub>Fe<sub>4</sub></b> in CDCl <sub>3</sub> . <b>Figure S2</b> ..... | 3 |
| FT-IR spectra of ligand <b>L2</b> and complex <b>Zn<sub>2</sub>Fe<sub>4</sub></b> . <b>Figure S3</b> .....                                   | 4 |
| Method preparation of the samples used for the investigation of the effect of the polarity of the environment. <b>Table S1</b> . ....        | 5 |
| Absorption spectrum of <b>L1</b> in dichloromethane solution. <b>Figure S4</b> .....                                                         | 6 |
| Emission spectrum of <b>L1</b> in dichloromethane solution. <b>Figure S5</b> .....                                                           | 6 |
| Absorption spectrum of <b>L2</b> in dichloromethane solution. <b>Figure S6</b> .....                                                         | 7 |
| Emission spectrum of <b>L2</b> in dichloromethane solution. <b>Figure S7</b> .....                                                           | 7 |

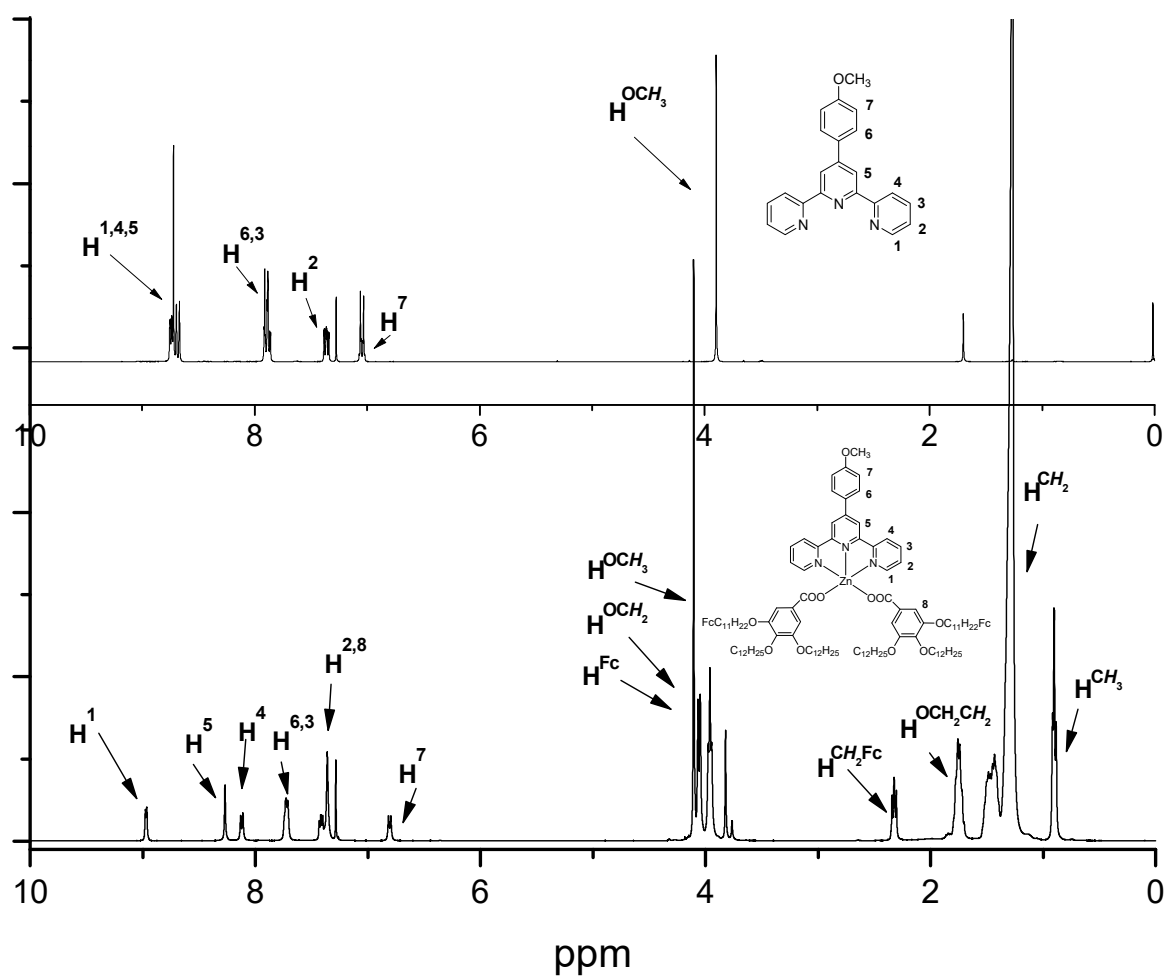

**Figure S1.**  $^1\text{H}$  NMR spectra of ligand L1 and complex  $\text{Zn}_1\text{Fe}_2$  in  $\text{CDCl}_3$ .

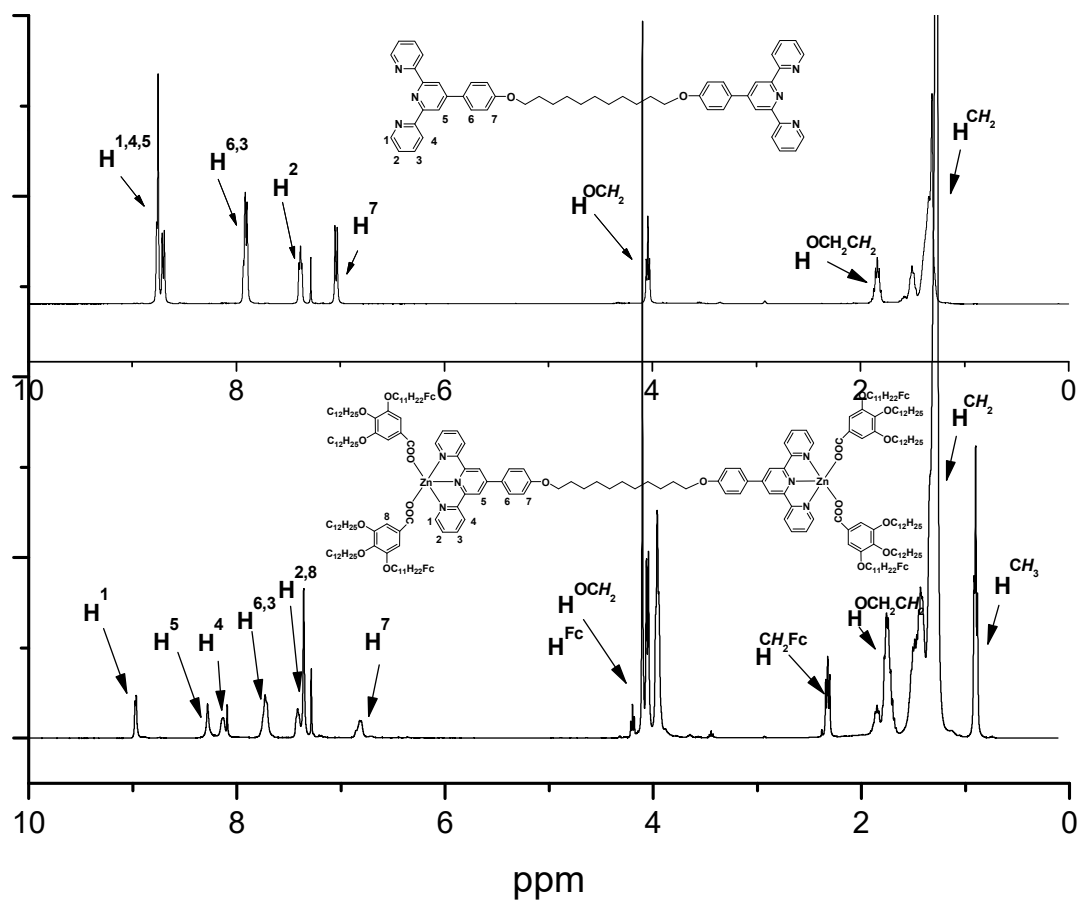

**Figure S2.**  $^1\text{H}$  NMR spectra of ligand L2 and complex  $\text{Zn}_2\text{Fe}_4$  in  $\text{CDCl}_3$ .

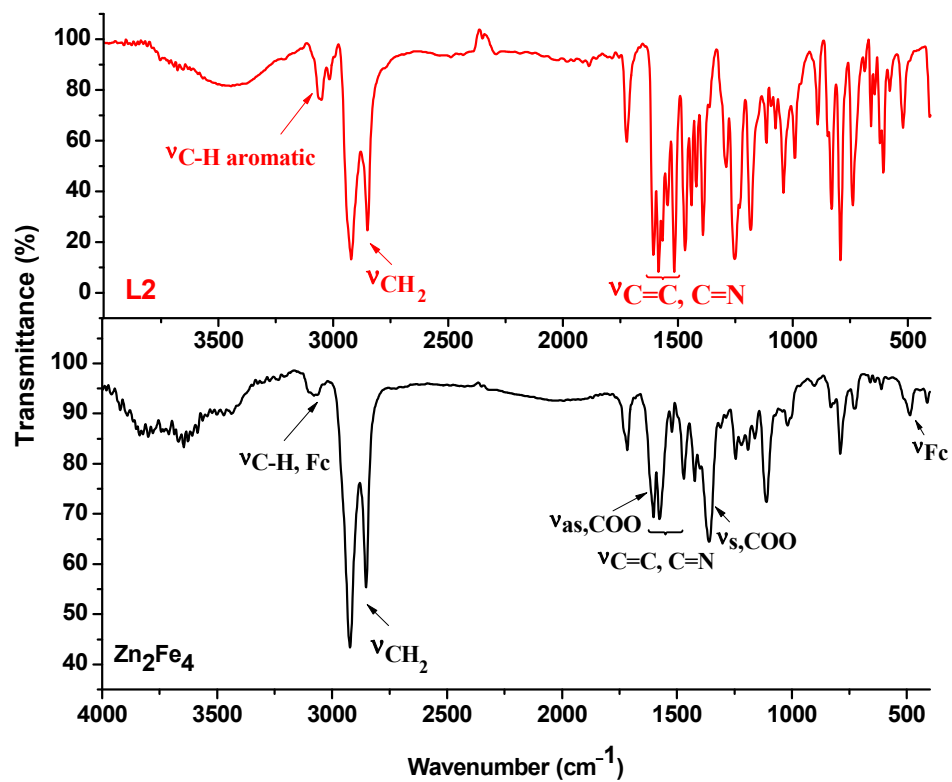

**Figure S3.** FT-IR spectra of ligand L2 and complex Zn<sub>2</sub>Fe<sub>4</sub> with the principal absorption bands evidenced.

**Table S1.** Method preparation of the samples used for the investigation of the effect of the polarity of the environment.

| Stock solution<br>of $1.0 \text{ E}^{-4} \text{ M}$ in<br>dichloromethane | Dichloromethane | Methanol | Volume of<br>the final<br>solution | Final<br>concentration         | % Methanol |
|---------------------------------------------------------------------------|-----------------|----------|------------------------------------|--------------------------------|------------|
| 1 mL                                                                      | 9 mL            | 0 mL     | 10 mL                              | $1.0 \text{ E}^{-5} \text{ M}$ | 0          |
| 1 mL                                                                      | 8 mL            | 1 mL     | 10 mL                              | $1.0 \text{ E}^{-5} \text{ M}$ | 10         |
| 1 mL                                                                      | 7 mL            | 2 mL     | 10 mL                              | $1.0 \text{ E}^{-5} \text{ M}$ | 20         |
| 1 mL                                                                      | 6 mL            | 3 mL     | 10 mL                              | $1.0 \text{ E}^{-5} \text{ M}$ | 30         |
| 1 mL                                                                      | 5 mL            | 4 mL     | 10 mL                              | $1.0 \text{ E}^{-5} \text{ M}$ | 40         |
| 1 mL                                                                      | 4 mL            | 5 mL     | 10 mL                              | $1.0 \text{ E}^{-5} \text{ M}$ | 50         |
| 1 mL                                                                      | 3 mL            | 6 mL     | 10 mL                              | $1.0 \text{ E}^{-5} \text{ M}$ | 60         |
| 1 mL                                                                      | 2 mL            | 7 mL     | 10 mL                              | $1.0 \text{ E}^{-5} \text{ M}$ | 70         |
| 1 mL                                                                      | 1 mL            | 8 mL     | 10 mL                              | $1.0 \text{ E}^{-5} \text{ M}$ | 80         |
| 1 mL                                                                      | 0 mL            | 9 mL     | 10 mL                              | $1.0 \text{ E}^{-5} \text{ M}$ | 90         |

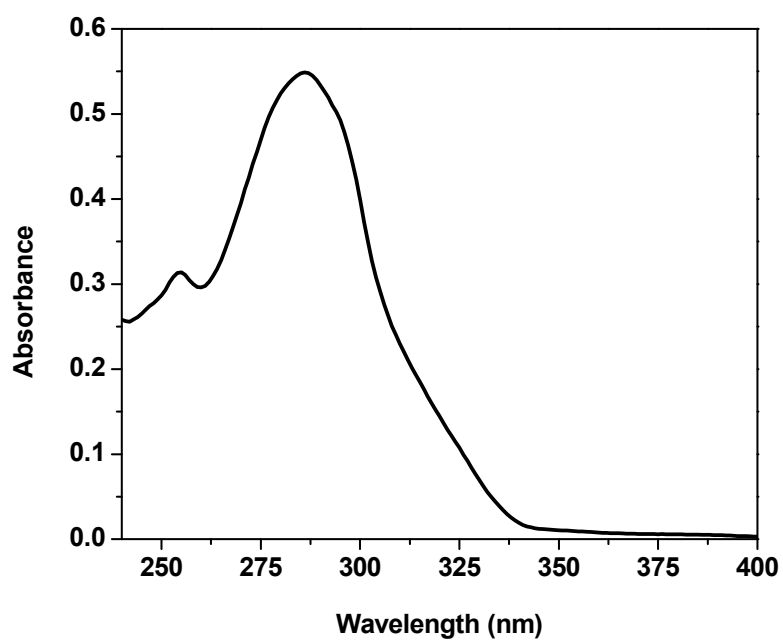

**Figure S4.** Absorption spectrum of L1 in  $1.0 \times 10^{-5}$  M dichloromethane solution (light path = 1 cm)

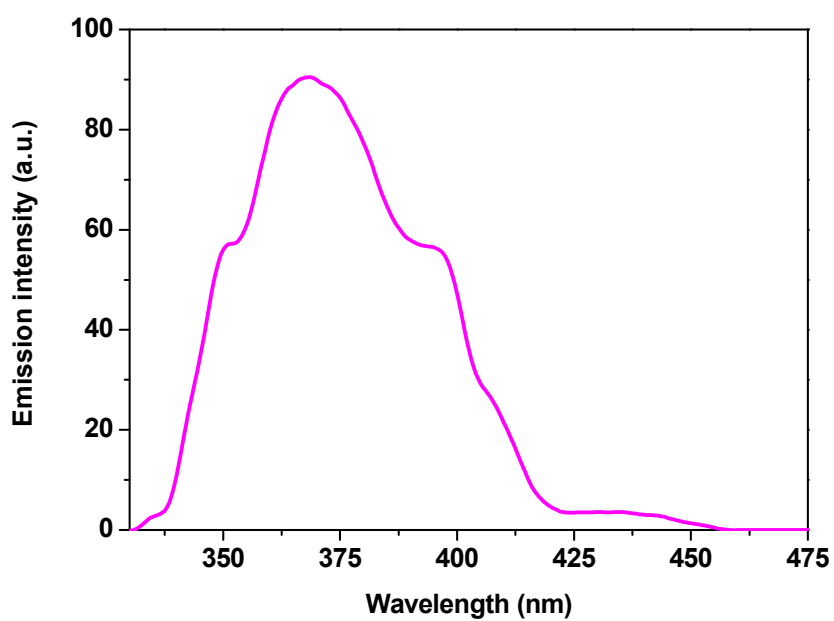

**Figure S5.** Emission spectrum of L1 in dichloromethane solution.

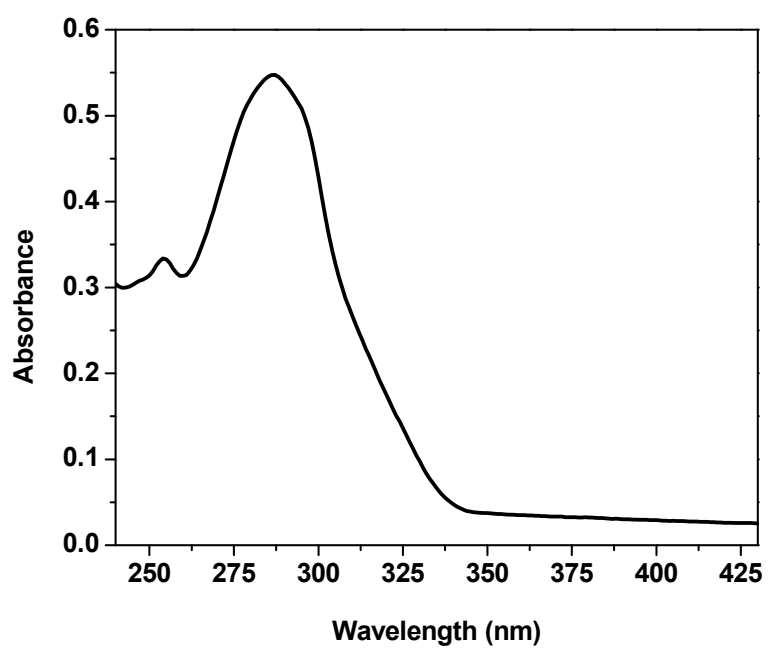

**Figure S6.** Absorption spectrum of L2 in  $1.0 \times 10^{-5}$  M dichloromethane solution (light path = 1 cm).

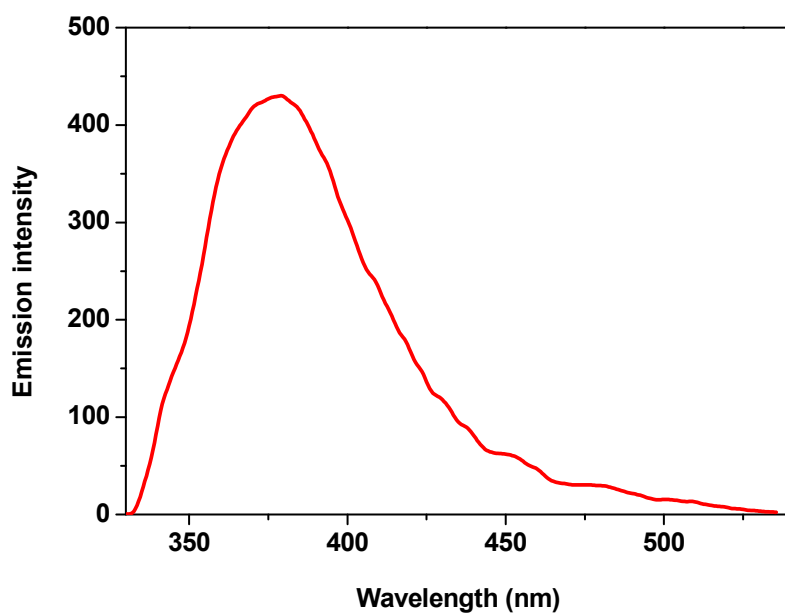

**Figure S7.** Emission spectrum of L2 in dichloromethane solution.
